# Supplementary material
Source: MDPI journal article supplement (https://www.mdpi.com/2571-6131/1/1/17)
Supplement: s1 [file s1]

# SUPPLEMENTARY SECTION

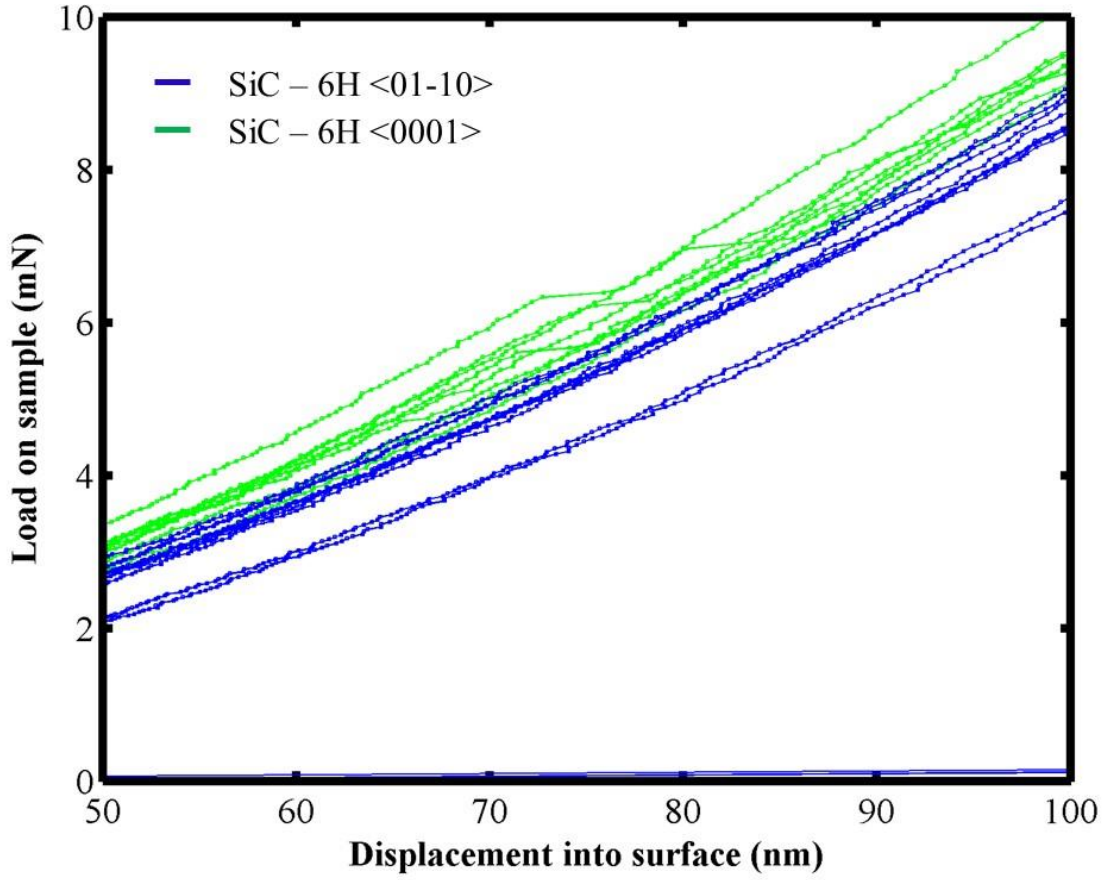

Figure S1: Load displacement curves of Berkovich indentation in SiC-6H in the <0001> orientation showing pop-in behavior.

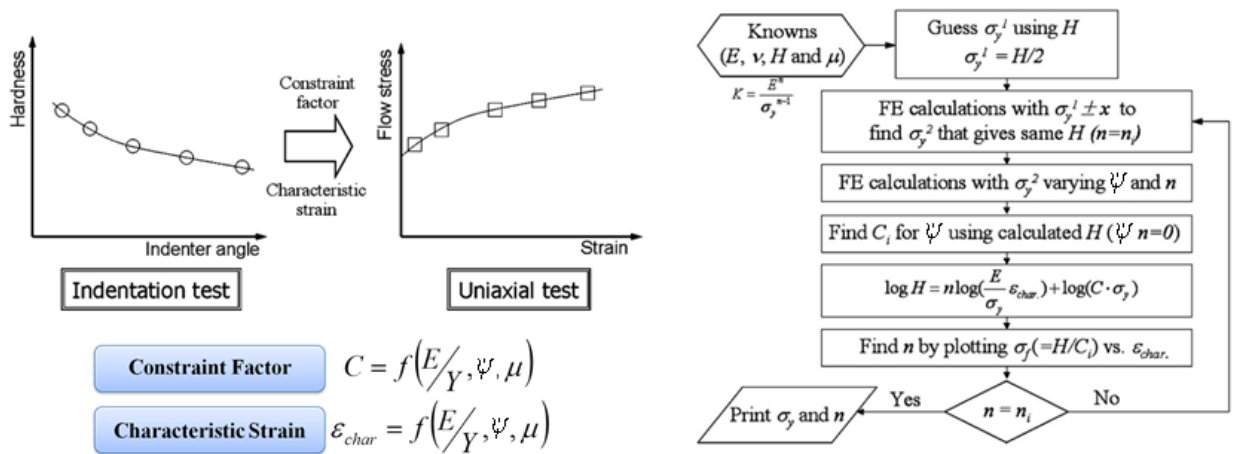

Figure S2: Schematic of the FEA method used based on Shim et al.[41] (right hand side flow chart from Shim et al.[41])
